# Supplementary material
Source: PubMed Central journal article supplement (PMC10991364)

## Suppl. Figure 1

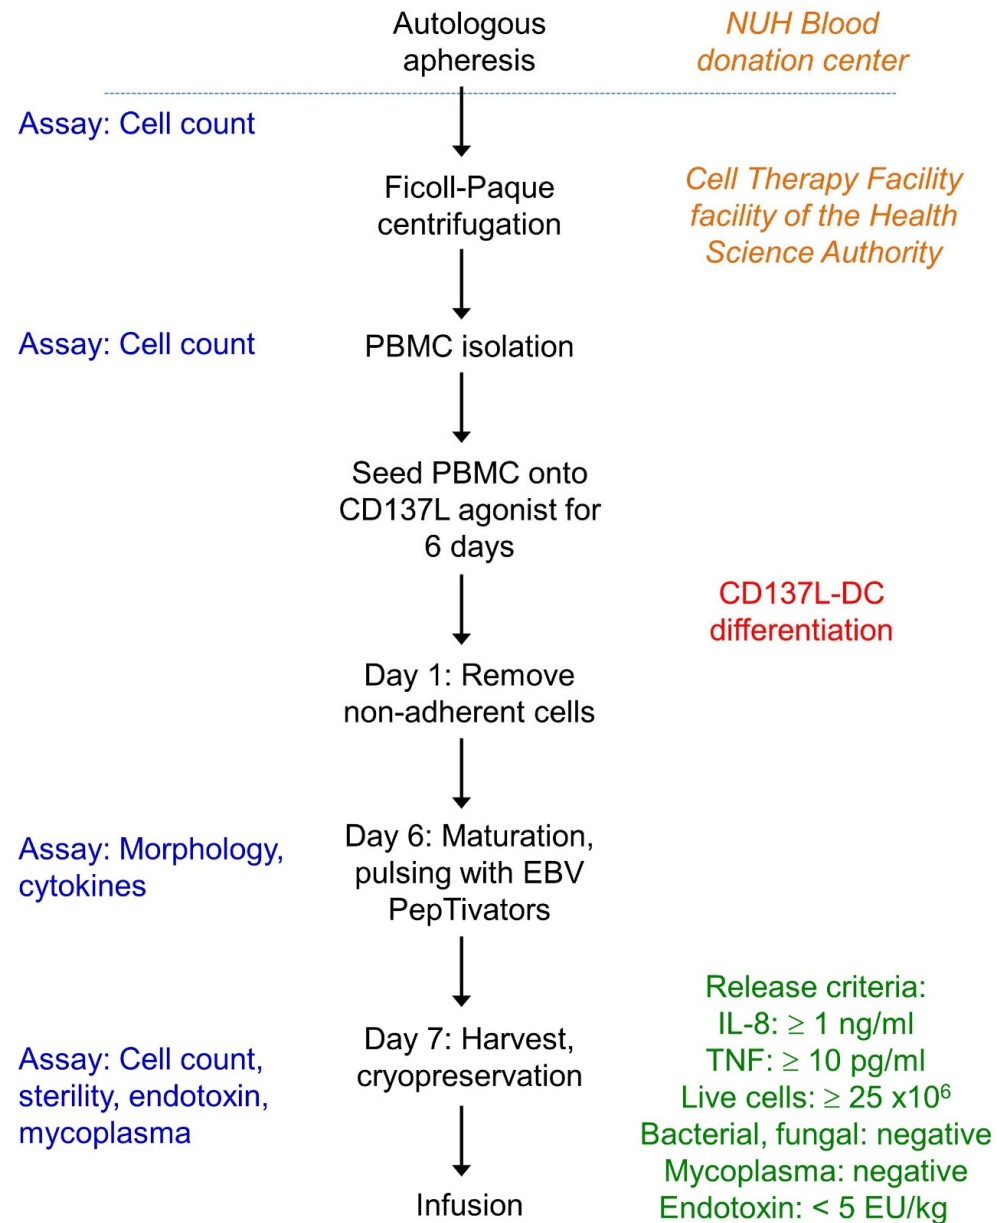

Suppl. Figure 1.  
CD137L-DC / CD137-  
DC-EBV-Vax generation  
work flow

## Suppl. Figure 2

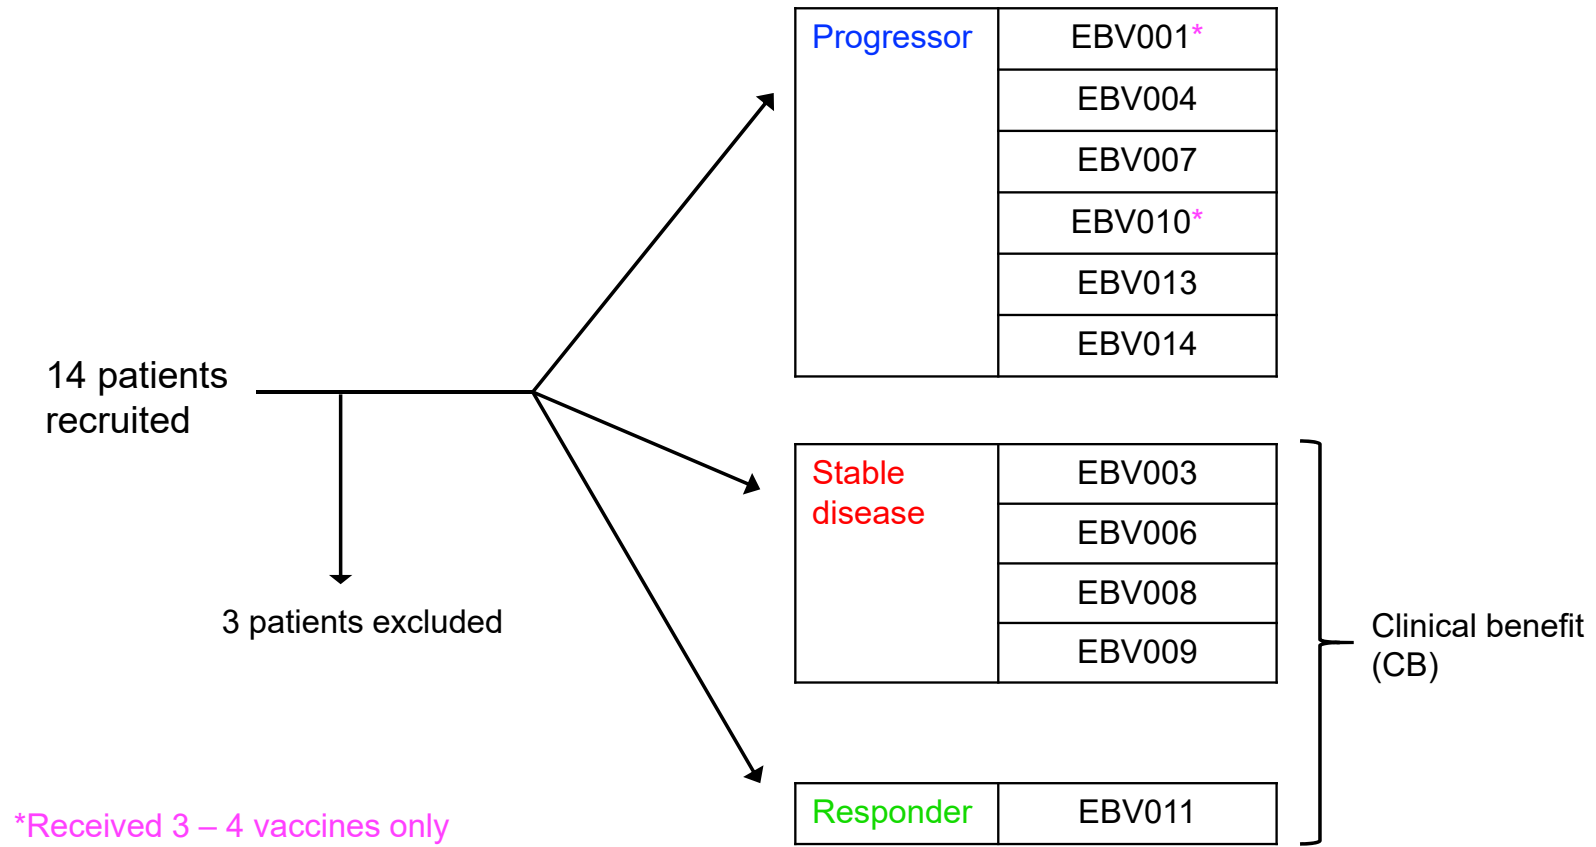

Suppl. Figure 2. Patients categorized according to their response to the vaccine.

### Pre-vaccination

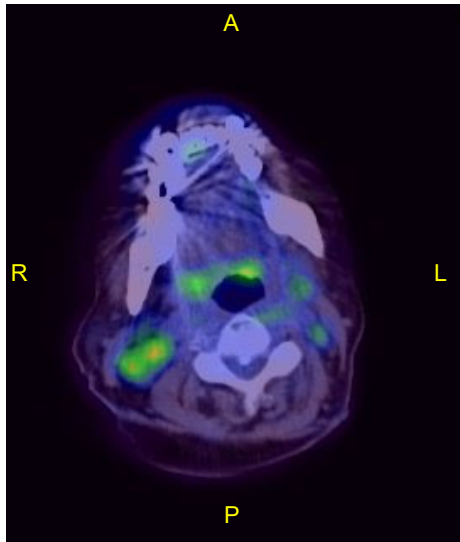

SUVmax 5.6

### Post-vaccination

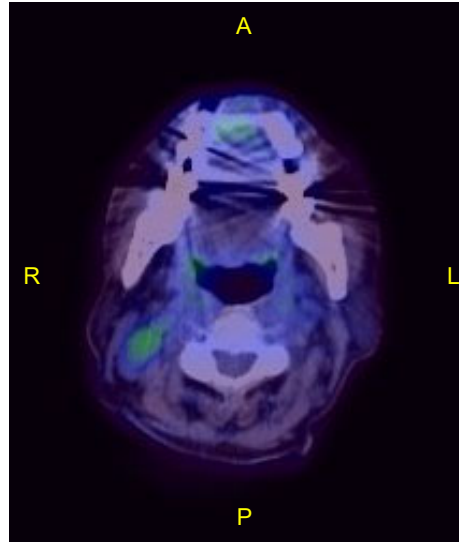

SUVmax 3.5

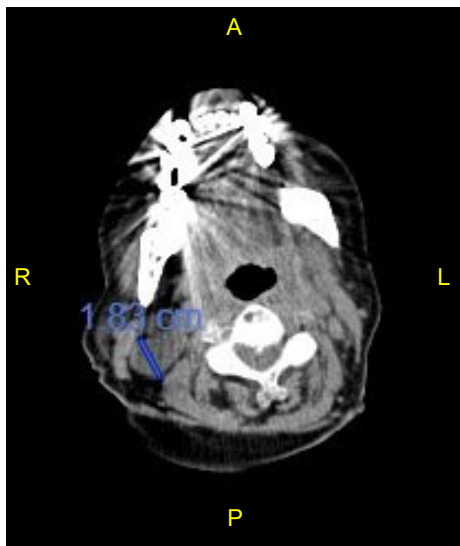

Short axis 18.3 mm

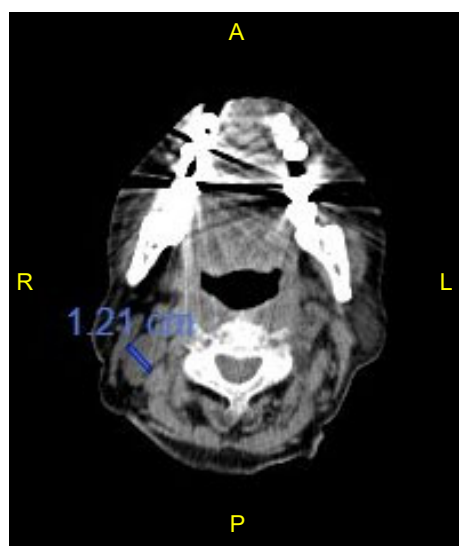

Short axis 12.1 mm

### Suppl. Figure 3

Patient EBV011 with partial response in the right level 2 cervical lymph node. Hybrid whole body PET/CT imaging was performed after intravenous administration of fluorine-18 fluorodeoxyglucose. The baseline scan was performed 3 weeks prior to first vaccination, and the post vaccination scan was performed 8 weeks after the last vaccination. Comparisons between the scans were made in: 1. The maximum standardized uptake value (SUVmax) of the index right level 2 cervical lymph node (upper panel) and 2. The length of the short axis of the lymph node (lower panel).

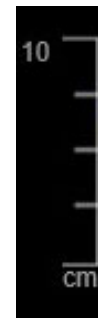

Supplement: 262_2021_3075_MOESM1_ESM.pdf [file 262_2021_3075_MOESM1_ESM.pdf]
